# Supplementary material
Source: Springer Nature journal article supplement (https://www.springermedizin.de/resource/supplementary/12885_2008_1324_MOESM1_ESM.pdf/9471766)

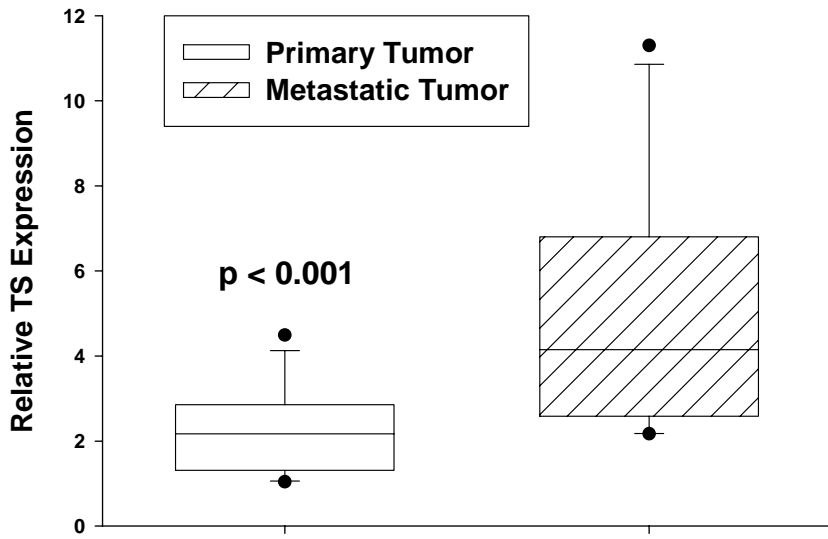

Tumor Tissue (N = 16)

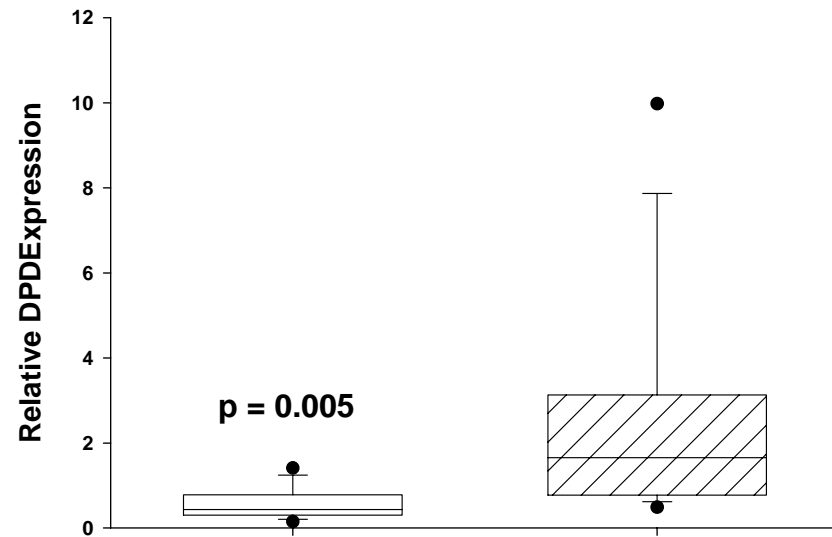

Tumor Tissue (N = 14)

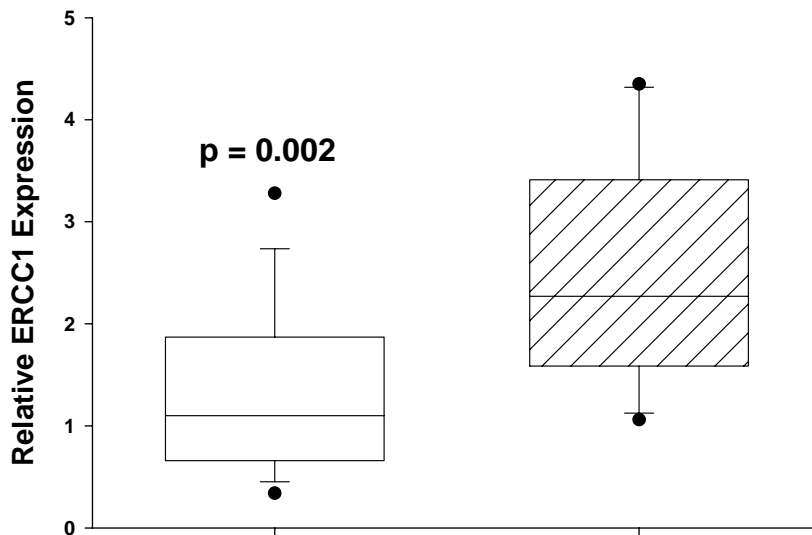

Tumor Tissue (N = 17)

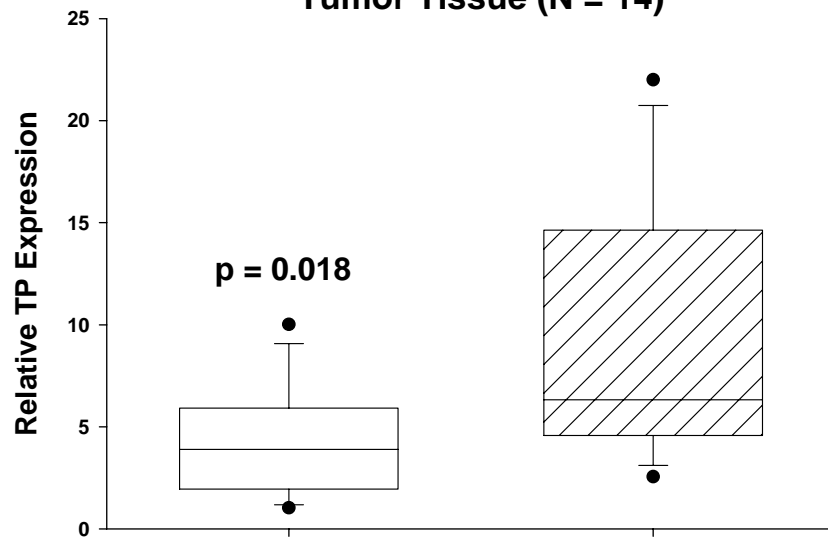

Tumor Tissue (N = 16)

Supplement: MOESM1 [file 9471766]
